# Supplementary material
Source: HighWire-hosted journal article supplement (https://www.cfp.ca/highwire/filestream/34668/field_highwire_adjunct_files/1/539_GHRYA_Resources_Page_1.pdf)
Supplement: 539_GHRYA_Resources_Page_1.pdf [file 539_GHRYA_Resources_Page_1.pdf]

Strength of Recommendations  
**Bold = Good**  
*Italics = Fair*  
 Plain Text = consensus or inconclusive evidence

Copyright A. Greig 2018  
 Disclaimer: Given the evolving nature of evidence and changing recommendations, the Greig Health Record is meant to be used as a guide only. Preventive care is delivered both episodically and at dedicated visits. This tool may be used in part or as a whole.

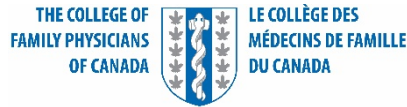

| Daily Nutritional Recommendations                                  |                                                    |            |            |            |
|--------------------------------------------------------------------|----------------------------------------------------|------------|------------|------------|
| Age (years)                                                        | 14-18<br>♀                                         | 14-18<br>♂ | 19-50<br>♀ | 19-50<br>♂ |
| Vegetables & Fruit (servings)                                      | 7                                                  | 8          | 7-8        | 8-10       |
| Grain products (servings)<br>Whole grains for at least half        | 6                                                  | 7          | 6-7        | 8          |
| Milk & alternatives (servings)                                     | 3-4                                                | 3-4        | 2          | 2          |
| Meat & alternatives (servings)                                     | 2                                                  | 3          | 2          | 3          |
| Include a small amount - 30 to 45 mL - of unsaturated fat each day |                                                    |            |            |            |
| Calcium (mg)<br><br>Upper limit (maximum)                          | 1300                                               | 1300       | 1000       | 1000       |
|                                                                    | 3000                                               | 3000       | 2500       | 2500       |
|                                                                    | No adjustment for pregnancy or lactation           |            |            |            |
| Vitamin D (IU) Health Canada<br><br>Upper limit (maximum)          | 600                                                | 600        | 600        | 600        |
|                                                                    | 3000                                               | 4000       | 4000       | 4000       |
|                                                                    | No adjustment for latitude, pregnancy or lactation |            |            |            |

<http://www.hc-sc.gc.ca/fn-an/index-eng.php>

| Canada's Food Guide                                                                                                                                                                                      |
|----------------------------------------------------------------------------------------------------------------------------------------------------------------------------------------------------------|
| <a href="http://www.hc-sc.gc.ca/fn-an/food-guide-aliment/order-commander/index-eng.php">www.hc-sc.gc.ca/fn-an/food-guide-aliment/order-commander/index-eng.php</a> English                               |
| <a href="http://www.hc-sc.gc.ca/fn-an/food-guide-aliment/order-commander/guide-trans-trad-eng.php">www.hc-sc.gc.ca/fn-an/food-guide-aliment/order-commander/guide-trans-trad-eng.php</a> other languages |

| BMI Calculation and Health Risk Classification                 |                          |                                    |
|----------------------------------------------------------------|--------------------------|------------------------------------|
| BMI = mass in kg/(height in metres) <sup>2</sup>               |                          |                                    |
| BMI = [weight in pounds/ (height in inches) <sup>2</sup> ]*703 |                          |                                    |
| Classification                                                 | BMI (kg/m <sup>2</sup> ) | Risk of developing health problems |
| Under weight                                                   | less than 18.5           | Increased                          |
| Normal weight                                                  | 18.5 to 24.9             | Least                              |
| Overweight                                                     | 25 to 29.9               | Increased                          |
| Obese Class I                                                  | 30 to 34.9               | High                               |
| Obese Class II                                                 | 35 to 39.9               | Very high                          |
| Obese Class III                                                | 40 and above             | Extremely high                     |

[www.hc-sc.gc.ca/fn-an/nutrition/weights-poids/index-eng.php](http://www.hc-sc.gc.ca/fn-an/nutrition/weights-poids/index-eng.php)

| Restrictive Diets                                                              |
|--------------------------------------------------------------------------------|
| Ask about special diets such as vegetarian, gluten-free, dairy or lactose free |

| Strategies for Good Sleep Habits                                                                                      |
|-----------------------------------------------------------------------------------------------------------------------|
| Have a consistent bedtime routine                                                                                     |
| Try to keep sleep and wake times the same for weekdays and weekends                                                   |
| Avoid daytime napping                                                                                                 |
| Have a relaxed setting at bedtime (dim lights, comfortable cool temperature, calm environment)                        |
| Get exercise every day, but avoid high-intensity exercise within 3 hrs of bedtime                                     |
| Fall asleep in your bedroom, not on the couch. Use your bed only for sleep and sex.                                   |
| Avoid caffeine after mid-afternoon and later                                                                          |
| Don't smoke, and don't use alcohol, herbal products or over-the-counter sleep aids to help you sleep                  |
| Avoid media/electronics in the bedroom. Avoid light emitting devices in the bedroom. Eg clocks that glow in the dark. |
| Limit screen time and bright lights before bedtime (avoid at least 1-2 hrs before bedtime)                            |
| Consult with a primary care practitioner about snoring or other sleep concerns                                        |

Adapted from [www.cdc.gov](http://www.cdc.gov), [www.cps.ca](http://www.cps.ca), [sleepfoundation.org](http://sleepfoundation.org), [healthysleep.med.harvard.edu](http://healthysleep.med.harvard.edu)

| Physical Activity Recommendations                                                          |                                                                                                   |
|--------------------------------------------------------------------------------------------|---------------------------------------------------------------------------------------------------|
| <b>150 minutes or more per week of Moderate to Vigorous Physical Activity</b>              |                                                                                                   |
|                                                                                            | Hints                                                                                             |
| Focus on moderate to vigorous aerobic activity broken into sessions of 10 minutes or more. | Choose a variety of physical activities you enjoy. Try joining a team or do activities in groups. |
| Add activities to target muscles and bones at least 2 days per wk.                         | Get into a routine.                                                                               |
|                                                                                            | Limit the time you spend in front of a screen – TV, computer video game etc.                      |
|                                                                                            | Reduce passive transportation – try walking, running or biking.                                   |

[www.csep.ca](http://www.csep.ca) <http://www.phac-aspc.gc.ca/hp-ps/hl-mvs/pa-ap/03paap-eng.php>

| Internet Resources for Patients              |                                                                                                                                                                                                                                                                                                                                                                                                                                                                                                                                                                                                                                                                                                                                                                                                                                                                                                                                                                                                                                                                                                                                                                                                                               |
|----------------------------------------------|-------------------------------------------------------------------------------------------------------------------------------------------------------------------------------------------------------------------------------------------------------------------------------------------------------------------------------------------------------------------------------------------------------------------------------------------------------------------------------------------------------------------------------------------------------------------------------------------------------------------------------------------------------------------------------------------------------------------------------------------------------------------------------------------------------------------------------------------------------------------------------------------------------------------------------------------------------------------------------------------------------------------------------------------------------------------------------------------------------------------------------------------------------------------------------------------------------------------------------|
| <b>General Young Adult Info.</b>             | <a href="http://www.cyh.com/">www.cyh.com/</a><br><a href="http://www.canada.ca/en/services/health/youth-health.html">www.canada.ca/en/services/health/youth-health.html</a>                                                                                                                                                                                                                                                                                                                                                                                                                                                                                                                                                                                                                                                                                                                                                                                                                                                                                                                                                                                                                                                  |
| Aboriginal Health                            | <a href="http://www.canada.ca/en/services/health/aboriginal-health.html">www.canada.ca/en/services/health/aboriginal-health.html</a>                                                                                                                                                                                                                                                                                                                                                                                                                                                                                                                                                                                                                                                                                                                                                                                                                                                                                                                                                                                                                                                                                          |
| Bullying                                     | <a href="http://www.stopbullying.gov/what-is-bullying/related-topics/young-adults/">www.stopbullying.gov/what-is-bullying/related-topics/young-adults/</a><br><a href="http://www.prevnet.ca">www.prevnet.ca</a><br><a href="http://www.cyh.com/HealthTopics/HealthTopicDetails.aspx?p=240&amp;np=296&amp;id=2069">www.cyh.com/HealthTopics/HealthTopicDetails.aspx?p=240&amp;np=296&amp;id=2069</a>                                                                                                                                                                                                                                                                                                                                                                                                                                                                                                                                                                                                                                                                                                                                                                                                                          |
| Complementary and Alternative Medicine (CAM) | <a href="http://nccih.nih.gov/">nccih.nih.gov/</a><br><a href="http://www.naturaldatabase.com">www.naturaldatabase.com</a>                                                                                                                                                                                                                                                                                                                                                                                                                                                                                                                                                                                                                                                                                                                                                                                                                                                                                                                                                                                                                                                                                                    |
| Dating Safety & Healthy Relationships        | <a href="http://www.rcmp-grc.gc.ca/cycc-cpcj/violence/dv-vf/index-eng.htm">www.rcmp-grc.gc.ca/cycc-cpcj/violence/dv-vf/index-eng.htm</a> <a href="http://www.redcross.ca">www.redcross.ca</a><br><a href="http://www.sexualhealthandrights.ca/">www.sexualhealthandrights.ca/</a>                                                                                                                                                                                                                                                                                                                                                                                                                                                                                                                                                                                                                                                                                                                                                                                                                                                                                                                                             |
| Hearing Loss/ Personal Music Players         | <a href="http://www.hc-sc.gc.ca/hl-vs/iyh-vsv/environ/hearing_loss-perte_audition-eng.php">www.hc-sc.gc.ca/hl-vs/iyh-vsv/environ/hearing_loss-perte_audition-eng.php</a><br><a href="http://www.hc-sc.gc.ca/hl-vs/iyh-vsv/life-vie/stereo-baladeur-eng.php">www.hc-sc.gc.ca/hl-vs/iyh-vsv/life-vie/stereo-baladeur-eng.php</a> <a href="http://www.soundsense.ca">www.soundsense.ca</a>                                                                                                                                                                                                                                                                                                                                                                                                                                                                                                                                                                                                                                                                                                                                                                                                                                       |
| HPV vaccine                                  | <a href="http://www.cdc.gov/std/hpv/stdfact-hpv-vaccine-young-women.htm">www.cdc.gov/std/hpv/stdfact-hpv-vaccine-young-women.htm</a>                                                                                                                                                                                                                                                                                                                                                                                                                                                                                                                                                                                                                                                                                                                                                                                                                                                                                                                                                                                                                                                                                          |
| LGBT Youth                                   | <a href="http://www.cdc.gov/lgbthealth/youth-resources.htm">www.cdc.gov/lgbthealth/youth-resources.htm</a><br><a href="http://www.prevnet.ca/bullying/parents/parents-of-lgbtq-youth">www.prevnet.ca/bullying/parents/parents-of-lgbtq-youth</a>                                                                                                                                                                                                                                                                                                                                                                                                                                                                                                                                                                                                                                                                                                                                                                                                                                                                                                                                                                              |
| Low Income                                   | <a href="http://www.canadabenefits.gc.ca">www.canadabenefits.gc.ca</a> benefits finder                                                                                                                                                                                                                                                                                                                                                                                                                                                                                                                                                                                                                                                                                                                                                                                                                                                                                                                                                                                                                                                                                                                                        |
| Mental Health                                | <a href="http://www.porticonetwork.ca/">www.porticonetwork.ca/</a><br><a href="http://mindyourmind.ca/">mindyourmind.ca/</a><br><a href="http://teenmentalhealth.org/">teenmentalhealth.org/</a>                                                                                                                                                                                                                                                                                                                                                                                                                                                                                                                                                                                                                                                                                                                                                                                                                                                                                                                                                                                                                              |
| Nutrition, Fitness                           | <a href="http://www.healthycanadians.ca">www.healthycanadians.ca</a><br><a href="http://www.evanshealthlab.com/make-your-day-harder-2/">www.evanshealthlab.com/make-your-day-harder-2/</a>                                                                                                                                                                                                                                                                                                                                                                                                                                                                                                                                                                                                                                                                                                                                                                                                                                                                                                                                                                                                                                    |
| Physical Activity                            | <a href="http://www.csep.ca/guidelines">www.csep.ca/guidelines</a><br><a href="http://www.phac-aspc.gc.ca/hp-ps/hl-mvs/pa-ap/04paap-eng.php">www.phac-aspc.gc.ca/hp-ps/hl-mvs/pa-ap/04paap-eng.php</a>                                                                                                                                                                                                                                                                                                                                                                                                                                                                                                                                                                                                                                                                                                                                                                                                                                                                                                                                                                                                                        |
| Sexuality & Relationships                    | <a href="http://www.sexandu.ca">www.sexandu.ca</a> includes emergency contraception<br><a href="http://www.sexualhealthandrights.ca/">www.sexualhealthandrights.ca/</a>                                                                                                                                                                                                                                                                                                                                                                                                                                                                                                                                                                                                                                                                                                                                                                                                                                                                                                                                                                                                                                                       |
| Sleep Issues                                 | <a href="http://www.sleepfoundation.org">www.sleepfoundation.org</a>                                                                                                                                                                                                                                                                                                                                                                                                                                                                                                                                                                                                                                                                                                                                                                                                                                                                                                                                                                                                                                                                                                                                                          |
| Substances and Addictions                    | <a href="http://www.camh.ca/en/hospital/health_information">www.camh.ca/en/hospital/health_information</a> (alcohol, marijuana, tobacco, cocaine, gambling )<br><a href="http://www.nationaldrugstrategy.gc.ca/prevention/youth-jeunes/">www.nationaldrugstrategy.gc.ca/prevention/youth-jeunes/</a> (drugs)<br><a href="http://betobaccofree.hhs.gov/dont-start/index.html">betobaccofree.hhs.gov/dont-start/index.html</a> (tobacco)<br><a href="http://www.quitnow.ca/tools-and-resources/e-cigarettes.php">www.quitnow.ca/tools-and-resources/e-cigarettes.php</a> (e-cigarettes)<br><a href="http://www.heartandstroke.ca/-/media/pdf-files/canada/position-statement/e-cigarettes-in-canada-factsheet-eng">www.heartandstroke.ca/-/media/pdf-files/canada/position-statement/e-cigarettes-in-canada-factsheet-eng</a> (e-cigarettes)<br><a href="http://www.vch.ca/media/TakeCarewithCannabis.pdf">www.vch.ca/media/TakeCarewithCannabis.pdf</a> (marijuana)<br><a href="http://www.hc-sc.gc.ca/fn-an/prodnatur/caf-drink-boissons-eng.php">www.hc-sc.gc.ca/fn-an/prodnatur/caf-drink-boissons-eng.php</a> (caffeinated energy drinks)<br><a href="http://www.problemgambling.ca">www.problemgambling.ca</a> (gambling) |

|                                         |                                                                                                                                                                                                                                                                            |
|-----------------------------------------|----------------------------------------------------------------------------------------------------------------------------------------------------------------------------------------------------------------------------------------------------------------------------|
| Sun Safety,<br>Tanning & Skin<br>Health | <a href="http://www.hc-sc.gc.ca/hl-vs/sun-sol/index-eng.php">www.hc-sc.gc.ca/hl-vs/sun-sol/index-eng.php</a><br><a href="http://www.dermatology.ca/sun-safety">www.dermatology.ca/sun-safety</a><br><a href="http://www.cancer.ca/prevention">www.cancer.ca/prevention</a> |
| Vaccinations,<br>Fears and Pain         | <a href="http://phm.utoronto.ca/helpinkids/">phm.utoronto.ca/helpinkids/</a><br><a href="http://www.canada.ca/en/public-health/topics/immunization-vaccines.html">www.canada.ca/en/public-health/topics/immunization-vaccines.html</a>                                     |
